# Supplementary material for: Physical and Chemical Characteristics of Droppings as Sensitive Markers of Chicken Health Status
Source: MDPI journal article supplement (doi:10.3390/ani14091389), 2024-05-06
Supplement: s1 [file s1]

### *1. The Evaluation of Short-chain Fatty Acids in chicken droppings*

Short-chain fatty acids (SCFAs) (acetic acid, propanoic acid, isobutyric acid, butyric acid, isovaleric acid, valeric acid, and caproic acid) were determined as described by Zhao et al. [16] with some modifications, which are given in Supplementary File S1. Sample (1 g) and 10 mL of water were homogenized for about 3 min. The pH of the obtained solution was adjusted to 2–3 with 5 M HCl and then kept at room temperature for 10 min during occasional shaking. Then the solution was centrifuged for 20 min at 5000 rpm, giving a clear supernatant. 1 µL of the supernatant was injected in the Gas Chromatograph GC-2010 Plus (Shimadzu corp., Kyoto, Japan) with a Mass Spectrometer GCMS-QP2010 (Shimadzu corp., Kyoto, Japan) for analysis.

### *2. Analysis of Volatile Compounds by Gas Chromatography–Mass Spectrometry*

Samples for gas chromatography (GC) analysis were prepared by using solid phase microextraction (SPME). A solid phase microextraction device with Stableflex (TM) fibre, coated with a 50-µm DVB-PDMS-Carboxen<sup>TM</sup> layer (Supelco, Bellefonte, PA, USA), was used for sample preparation. For headspace extraction, 1 g of sample in the 20-mL extraction vial, sealed with a polytetrafluoroethylene septum, was thermostated at 60 °C for 15 min, thereby exposing the fibre in the headspace. The fibre was then exposed to the headspace of the vial for a further 10 min. The desorption time was 2 min. For gas chromatography–mass spectrometry (GC–MS), a GCMS-QP2010 (Shimadzu, Japan) was used. The gas chromatograph was equipped with an AOC-5000 Plus Shimadzu autosampler, upgraded with an SPME analysis kit. The following analysis parameters were used: for the ionisation of analytes at 70 eV; for separation of VCs, a low-polarity Rxi®-5MS column (Restek, Bellefonte, PA, USA); injector temperature 250 °C, ion source, and interface temperatures 220 °C and 280 °C, respectively; the temperature gradient: from 35 °C (5 min hold) to 200 °C (10 °C/min) and then up to 280 °C (25 °C/min) (5 min hold); carrier gas was helium (99.999% detector purity, Linde, Vilnius, Lithuania), pressure of 6.61 psi (45.6 kPa); column flow 0.97 mL/min; the VC were identified according to the mass spectra libraries (NIST11, NIST11S, FFNSC2).

### *3. Fatty Acid Profile Analysis*

The fatty acid (FA) profile composition of the dropping samples was determined using gas chromatography–flame ionisation detection (GC–FID; Agilent 6890N Gas Chromatograph, Agilent Technologies, Santa Clara, CA, USA). First, FA were dissolved in cyclohexane (100 mg in 4 mL), then methyl esters of FA were prepared by transmethylation using 8 mL of 1.5% sulphuric acid in methanol, and kept at 60 °C for 12 h. The samples were cooled, shaken for 30 s, and then centrifuged for 10 min at 3000× g at 17 °C. They were then injected with 100 µL of the upper portion of the supernatant (previously diluted with cyclohexane in the ratio of 1:9) into a capillary BPX90 column (60 m × 0.32 mm ID × 0.25-µm film thickness; SGE, Santa Clara, CA, USA). The following parameters were used: flame ionisation detector: 280 °C; H<sub>2</sub> flow: 40 mL/min; air flow: 450 mL/min; helium (carrier gas) flow: 1 mL/min; injector: 250 °C (split 1:10); oven temperature: 50 °C for 2 min, then 4 °C/min to 245 °C, and then 245 °C for 15 min. Each FA was identified according to its retention time and is expressed as a percentage of the total peak area of all FA in the sample.
